# Supplementary material for: Red blood cell indices and anaemia as causative factors for cognitive function deficits and for Alzheimer’s disease
Source: PubMed Central journal article supplement (PMC6022699; doi:10.1186/s13073-018-0556-z), 2018-06-28

Additional file 2: Fig. S1- Anaemia has a significant effect on four cognitive test

measures

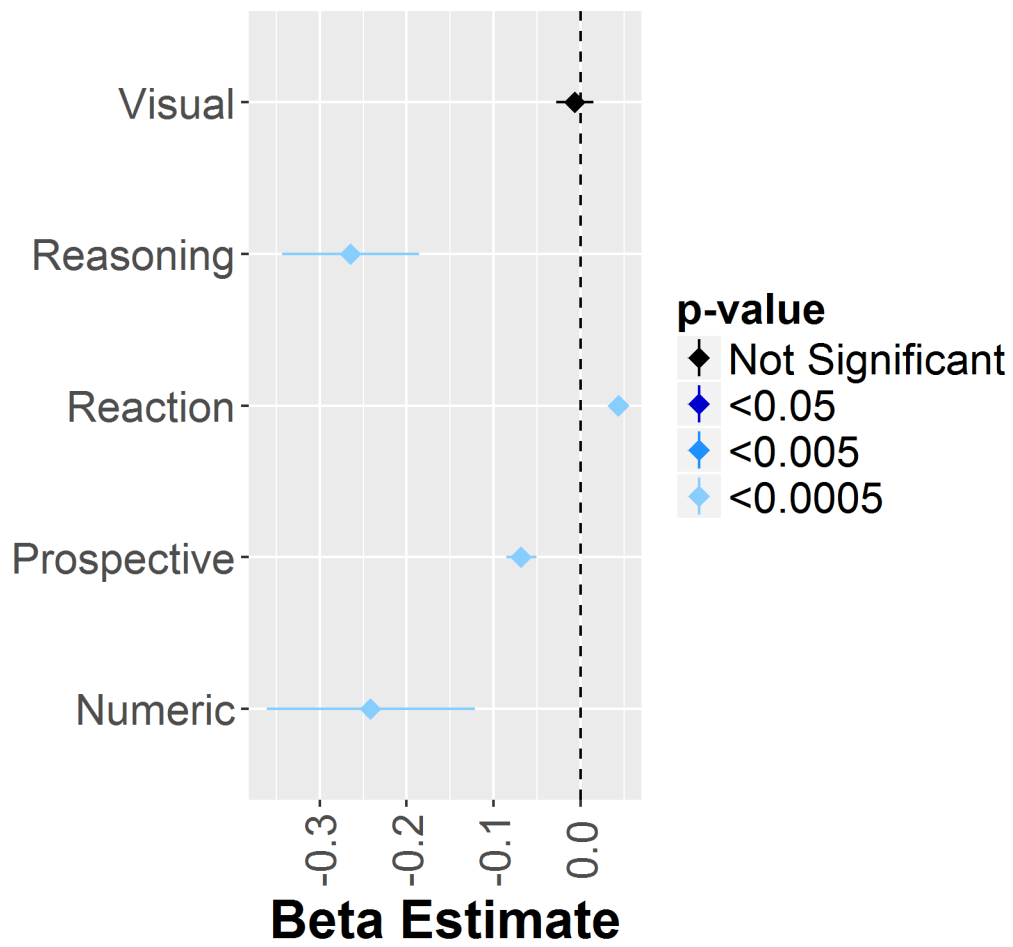

Additional file 2: Fig. S2 - 2 sample MR Results replicating the direction of effect for

MCH on the Verbal-Numeric Reasoning outcome

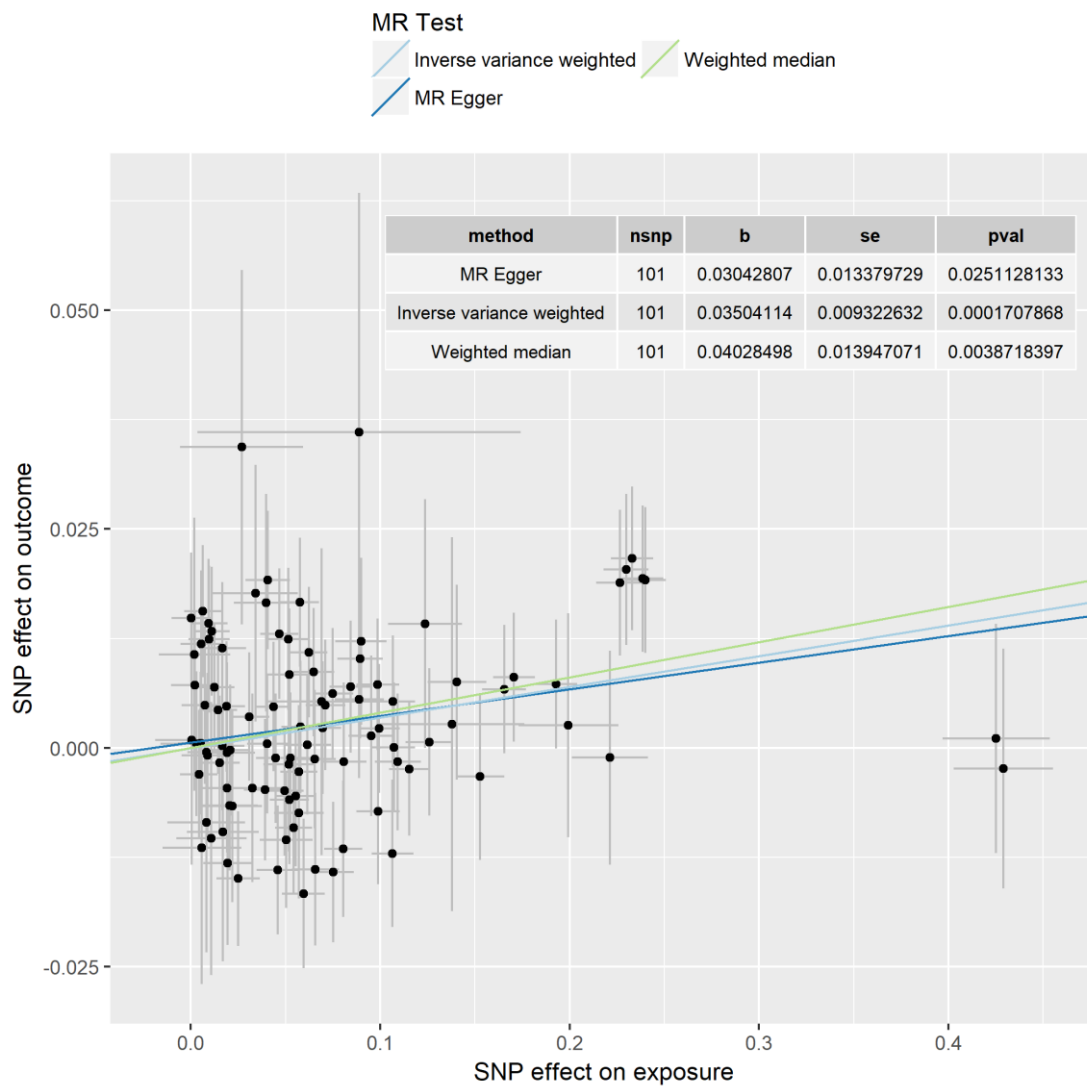

Additional file 2: Fig. S3 - Rate of Change as a measure of red blood cell count

Blood cell count is shown compared to visit age showing the time between visits for both cases and controls.

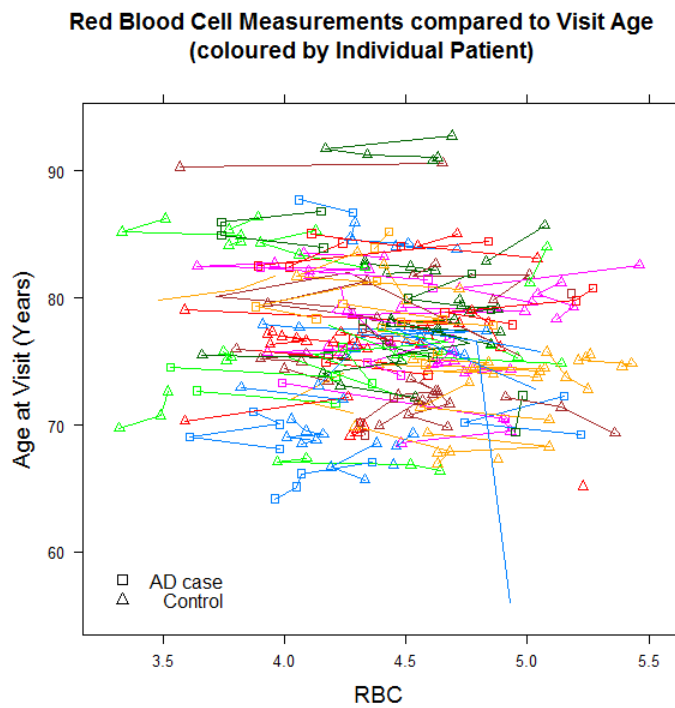

Supplement: 13073_2018_556_MOESM2_ESM.pdf [file 13073_2018_556_MOESM2_ESM.pdf]
